# Supplementary material for: Beneficial effects of Cripto-1 for transarterial chemoembolization in hepatocellular carcinoma
Source: publisher site journal article supplement (doi:10.18632/aging.101951), 2019-05-27
Supplement: Supplementary file [file aging-v11i10-101951-supplementary-material-SD1.pdf]

SUPPLEMENTARY FIGURES

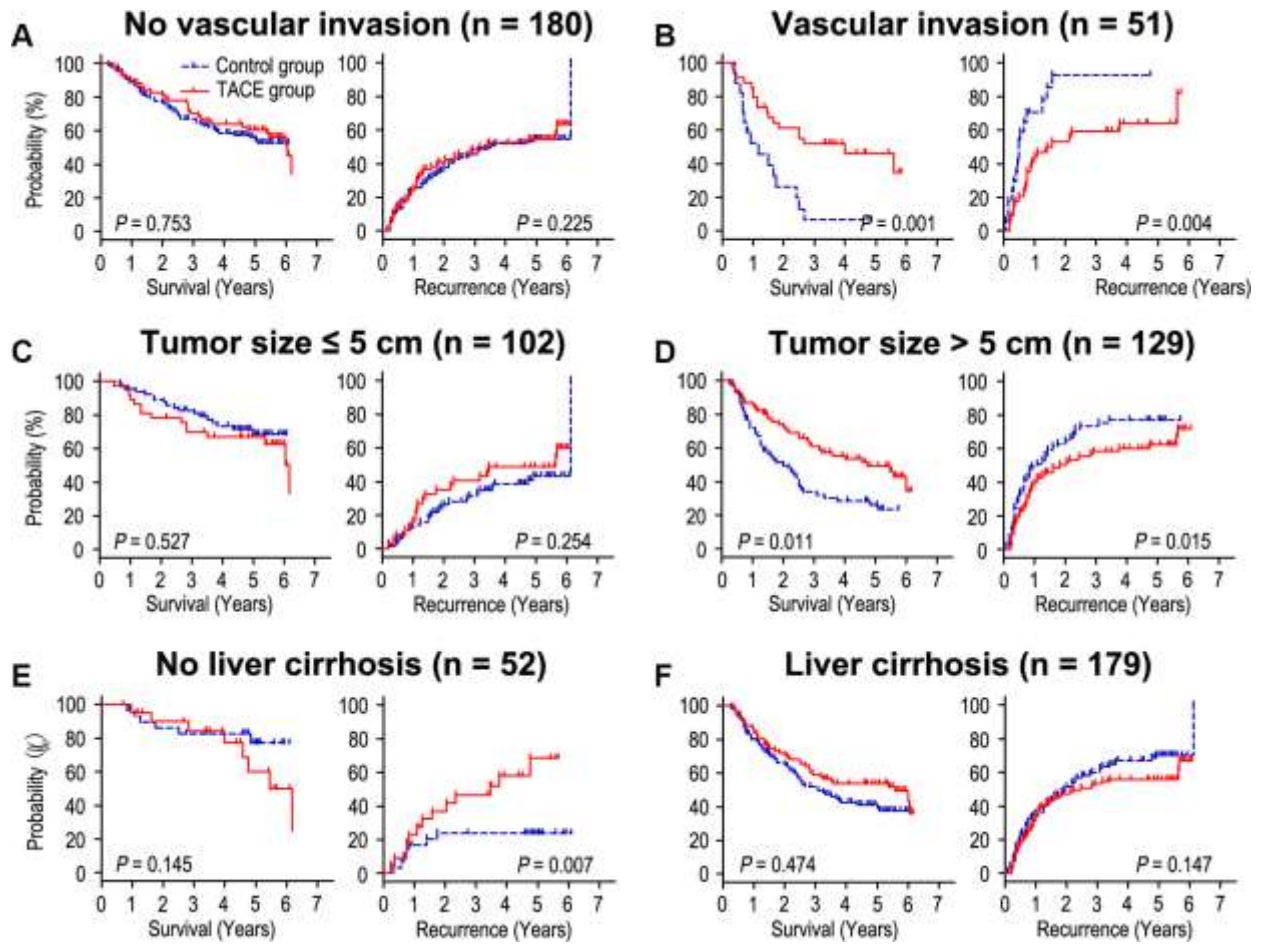

**Supplementary Figure 1. Prognostic significance of postoperative adjuvant TACE in several clinical subgroups.** All patients were stratified according to vascular invasion (A, B), tumor size (C, D) or liver cirrhosis (E, F). Kaplan-Meier survival estimates and log-rank tests were used to analyze the correlation of adjuvant TACE therapy and OS/TTR in clinical subgroups.

**Supplementary Table 1. Patient characteristics.**

| <b>Variable</b>                | <b>No. of patients (%)</b> |
|--------------------------------|----------------------------|
| No. of patients                | 231 (100)                  |
| Age: Median [range], y         | 48 [15–80]                 |
| Gender                         |                            |
| Female                         | 21 (9.1)                   |
| Male                           | 210 (90.9)                 |
| HBsAg                          |                            |
| Negative                       | 17 (7.4)                   |
| Positive                       | 214 (92.6)                 |
| AFP: Median [range], ng/mL     | 174.1 [0.9–121000]         |
| GGT: Median [range], U/l       | 55.4 [3.5–472.0]           |
| Tumor size: Median [range], cm | 6.0 [1.0–21.0]             |
| Liver cirrhosis                |                            |
| No                             | 52 (22.5)                  |
| Yes                            | 179 (77.5)                 |
| Child-Pugh class               |                            |
| A                              | 228 (98.7)                 |
| B                              | 3 (1.3)                    |
| Tumor number                   |                            |
| Single                         | 156 (67.5)                 |
| Multiple                       | 75 (32.5)                  |
| Satellite nodule               |                            |
| No                             | 167 (72.3)                 |
| Yes                            | 64 (27.7)                  |
| Tumor capsule                  |                            |
| No/incomplete                  | 160 (69.3)                 |
| Complete                       | 71 (30.7)                  |
| Tumor differentiation          |                            |
| I                              | 9 (3.9)                    |
| II                             | 137 (59.3)                 |
| III                            | 80 (34.6)                  |
| IV                             | 5 (2.2)                    |
| Vascular invasion              |                            |
| No                             | 180 (77.9)                 |
| Yes                            | 51 (22.1)                  |
| TNM stage                      |                            |
| I                              | 114 (49.4)                 |
| II                             | 28 (12.1)                  |
| III                            | 89 (38.5)                  |
| BCLC stage                     |                            |
| 0                              | 14 (6.0)                   |
| A                              | 63 (27.3)                  |
| B                              | 100 (43.3)                 |
| C                              | 54 (23.4)                  |
| Adjuvant TACE                  |                            |
| No                             | 126 (54.5)                 |
| Yes                            | 105 (45.5)                 |
